# Supplementary material for: Amino Acid Availability Determines Plant Immune Homeostasis in the Rhizosphere Microbiome
Source: PubMed Central journal article supplement (PMC10127609; doi:10.1128/mbio.03424-22), 2023-02-14

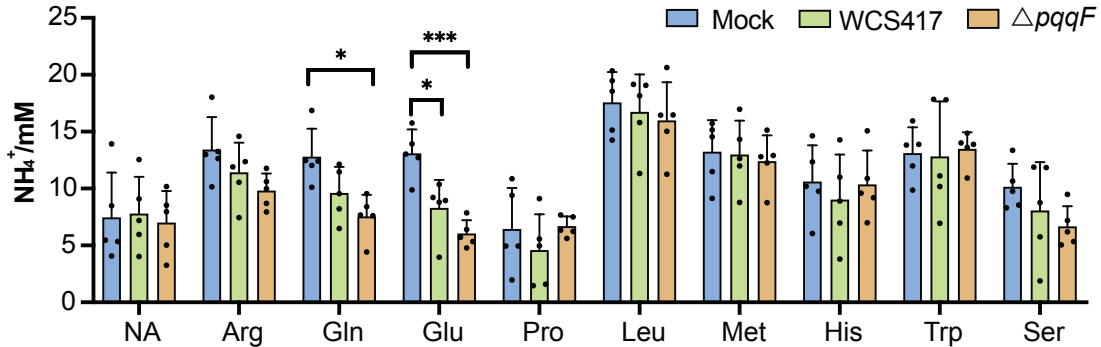

Supplement: mbio.03424-22-s0008.pdf [file mbio.03424-22-s0008.pdf]
